# Supplementary material for: Effect of metabolic syndrome on testosterone levels in patients with metastatic prostate cancer: a real-world retrospective study
Source: PeerJ. 2024 Aug 1;12:e17823. doi: 10.7717/peerj.17823 (PMC11298165; doi:10.7717/peerj.17823)
Supplement: Data S1 [file peerj-12-17823-s001.xlsx]

## Sheet: Sheet1
Notes：汉族:Han ethnic,蒙古族：Mongol ethnic，维吾尔族：Uighur ethnic，哈萨克族：Kazakh ethnic，回族:Hui ethnic,满族：Manchu ethnic，布依族：Buyei ethnic，壮族：Zhuang ethnic ；经常吸烟：Frequent smoking，从未吸烟：Never smoked；经常饮酒:Frequent drinking;从未饮酒：Never drank；高瘤：high-volume disease，低瘤：low-volume disease；无：none,有：yes.
Age (years)	Age grouping (0 for ≤70, 1 for >70)	Ethnic grouping (0 for Han, 1 for others)	Smoking subgroup (0 for non-smoking; 1 for smoking)	Drinking subgroup (0 for no drinking; 1 for drinking)	nerve invasion grouping (0 for none; 1 for yes)	Visceral metastasis subgroup (0 for none; 1 for yes)	Tumor burden grouping (0 is low, 1 is high)	Hypertension subgroup (0 for none; 1 for yes)	Blood pressure mm/Hg	systolic blood pressure	diastolic blood pressure	Hyperglycemia subgroup (0 for none; 1 for yes)	Fasting glucose mmol/L	Triglycerides mmol/l	Triglyceride subgroup (<1.7 is 0, ≥1.7 is 1)	HDL mmol/l	HDL subgroups (<1.04 is 0, ≥1.04 is 1)	Dyslipidemia (0 is absent, 1 is present)	BMI kg/m2	BMI grouping (0 for <25, 1 for ≥25)	Metabolic syndrome subgroups (0 for none, 1 for yes)	Risk factor scores	Composite metabolic score (0-1 is 0, 2 is 1, 3 is 2, 4-5 is 3)	Composite metabolic score (0-2 as 0, 3 as 1, 4-5 as 2)	T staging	T-stage grouping (<4 is 0, ≥4 is 1)	Gleason score	Gleasson score grouping (<8 as 0, ≥8 as 1)	Initial TPSAng/ml	Initial PSA grouping (0 for <100, 1 for ≥100)	Initial testosterone nmol/l	Minimum testosterone nmol/l in 1-year follow-up cycle	Lowest testosterone grouping in 1-year follow-up cycle (<0.7 is 0, ≥0.7 is 1)	Time to drop to minimum testosterone (months)	Time to decline to minimum testosterone subgroups (0 for ≤6 months, 1 for >6 months)	Time to CRPC (months)	Overall survival (months)
71	1	0	0	1	0	0	0	0	129/80	129	80	1	6.62	1.39	0	1.47	1	0	26.9	1	0	2	1	0	4	1	8	1	150.6	1	8.6	0.13	0	4	0	38	62
67	0	1	1	0	0	0	1	0	120/70	120	70	0	4.64	0.75	0	1.55	1	0	23.7	0	0	0	0	0	4	1	8	1	587.6	1	11.2	0.01	0	2	0	24	72
71	1	1	1	0	0	0	0	0	120/75	120	75	1	6.25	1.09	0	1.13	1	0	24.2	0	0	1	0	0	2c	0	7	0	90	0	13.4	0.06	0	6	0	23	84
75	1	0	1	1	0	0	1	1	143/84	143	84	0	5.98	1.12	0	0.74	0	1	23.7	0	0	2	1	0	4	1	7	0	160	1	23	0.82	1	5	0	45	108
75	1	0	0	0	0	0	0	1	150/85	150	85	0	5.46	0.88	0	0.93	0	1	24.5	0	0	2	1	0	3b	0	8	1	211.2	1	18	0.02	0	4	0	25	58
63	0	0	1	0	0	0	1	0	129/82	129	82	0	3.93	2.86	1	1.34	1	1	30.8	1	0	2	1	0	4	1	9	1	2472	1	26	0.13	0	3	0	32	40
75	1	0	1	0	0	0	0	1	185/93	185	93	0	5.17	1.65	0	1.17	1	0	26.9	1	0	2	1	0	4	1	9	1	2164.8	1	25	0.02	0	3	0	40	82
68	0	1	0	0	0	0	1	0	125/80	125	80	0	5.03	1.07	0	1.25	1	0	17.6	0	0	0	0	0	4	1	10	1	2077.24	1	15.3	0.05	0	6	0	38	68
59	0	0	1	1	1	0	0	0	128/71	128	71	0	5.42	1.04	0	0.82	0	1	29.8	1	0	2	1	0	2c	0	7	0	85	0	7.8	0.02	0	6	0	60	83
60	0	0	1	0	0	0	0	0	125/75	125	75	0	4.67	0.68	0	1.38	1	0	24.5	0	0	0	0	0	2c	0	7	0	97.8	0	14.3	0.04	0	7	1	31	42
71	1	0	1	0	1	0	0	0	120/70	120	70	0	5.67	1.03	0	0.88	0	1	20.3	0	0	1	0	0	3b	0	8	1	123.6	1	16.5	0.13	0	7	1	28	39
77	1	0	0	0	0	0	0	0	120/75	120	75	1	6.94	1.4	0	0.7	0	1	24.8	0	0	2	1	0	4	1	9	1	309	1	14.13	0.71	1	8	1	30	36
56	0	1	1	1	0	0	1	1	140/100	140	100	1	6.48	1.31	0	1.15	1	0	24.5	0	0	2	1	0	4	1	9	1	796.2	1	13.5	0.08	0	5	0	40	72
65	0	0	0	0	0	1	1	0	125/80	125	80	0	5.38	1.05	0	0.88	0	1	25.9	1	0	2	1	0	3b	0	7	0	63.9	0	15.3	0.05	0	6	0	45	66
72	1	0	1	1	1	0	0	0	128/80	128	80	0	4.55	1.15	0	0.64	0	1	25	1	0	2	1	0	2c	0	7	0	226.00	1	17.8	0.07	0	4	0	26	30
73	1	1	1	1	1	0	0	0	120/70	120	70	0	4.94	1.45	0	1.48	1	0	21.8	0	0	0	0	0	2c	0	9	1	737.5	1	10.5	0.12	0	6	0	44	46
77	1	1	0	0	1	0	0	1	140/80	140	80	1	6.66	0.8	0	1.2	1	0	23	0	0	2	1	0	4	1	9	1	143.5	1	17.8	0.03	0	3	0	16	20
71	1	0	0	0	0	0	1	0	120/66	120	66	1	8.07	0.69	0	1.34	1	0	22	0	0	1	0	0	3b	0	8	1	342	1	6.8	0.11	0	7	1	30	84
66	0	0	1	1	1	0	0	1	150/103	150	103	0	4.59	1.25	0	0.88	0	1	24	0	0	2	1	0	2c	0	9	1	89.24	0	16.8	0.12	0	4	0	21	38
71	1	0	0	0	0	0	1	1	140/75	140	75	1	6.61	0.89	0	1.96	1	0	21.1	0	0	2	1	0	4	1	10	1	325.1	1	1.88	0.02	0	6	0	21	58
77	1	1	0	0	0	0	0	0	120/70	120	70	0	4.5	0.87	0	1.17	1	0	18.7	0	0	0	0	0	2c	0	9	1	123.31	1	5.19	0.36	0	8	1	26	38
76	1	1	1	1	1	0	1	0	122/70	122	70	0	5.32	1.6	0	1.93	1	0	24.2	0	0	0	0	0	4	1	7	0	135.45	1	11.3	0.8	1	5	0	12	84
74	1	1	0	0	0	1	0	1	160/80	160	80	0	5.21	1.09	0	0.74	0	1	24	0	0	2	1	0	3b	0	10	1	94.64	0	15.2	0.1	0	3	0	6	26
66	0	1	1	0	0	0	1	1	140/80	140	80	0	4.93	1.63	0	1	0	1	24.2	0	0	2	1	0	4	1	10	1	600	1	11.3	0.06	0	4	0	15	84
68	0	1	0	1	1	0	0	0	127/80	127	80	0	5.0	0.75	0	1.37	1	0	23.9	0	0	0	0	0	4	1	7	0	28.9	0	18.3	0.12	0	6	0	15	26
72	1	1	0	0	1	0	1	1	170/90	170	90	0	5	0.71	0	1.23	1	0	23.2	0	0	1	0	0	3b	0	10	1	4245	1	18.7	1.3	1	5	0	22	84
65	0	1	1	0	0	1	1	0	92/57	92	57	1	9.78	1.13	0	1.61	1	0	16.8	0	0	1	0	0	4	1	9	1	239	1	12.5	0.15	0	6	0	25	30
75	1	1	1	1	0	0	0	1	160 /70	160	70	0	4.58	1.6	0	1.36	1	0	23.5	0	0	1	0	0	3b	0	7	0	80.59	0	12.3	0.75	1	7	1	26	34
69	0	1	0	0	1	1	1	0	120/70	120	70	1	6.4	1.22	0	0.76	0	1	18.6	0	0	2	1	0	4	1	9	1	328.7	1	17.6	0.01	0	4	0	25	60
69	0	0	1	0	0	1	1	0	120/70	120	70	0	4.83	0.87	0	1.12	1	0	23.3	0	0	2	1	0	4	1	9	1	293.2	1	18.6	0.11	0	6	0	8	26
73	1	0	1	1	0	0	1	0	125/67	125	67	0	4.98	0.78	0	1.33	1	0	20	0	0	0	0	0	3b	0	7	0	21	0	12.2	0.01	0	4	0	22	84
67	0	1	0	0	0	0	0	1	144/90	144	90	0	5.36	1.2	0	1.21	1	0	26.4	1	0	2	1	0	2c	0	7	0	9.0	0	10.7	0.26	0	6	0	17	72
85	1	1	0	0	1	0	0	0	120/78	120	78	0	5.79	1.29	0	1.37	1	0	21.8	0	0	0	0	0	2b	0	9	1	90	0	14.77	0.16	0	9	1	25	45
67	0	1	0	1	0	0	0	1	171/82	171	82	1	6.64	0.65	0	1.2	1	0	21.8	0	0	2	1	0	4	1	8	1	26.47	0	13.2	0.03	0	2	0	24	72
58	0	0	0	0	0	0	0	0	125 /70	125	70	1	6.49	1.07	0	1.63	1	0	24.2	0	0	1	0	0	3b	0	9	1	23.3	0	10.82	0.14	0	5	0	25	55
64	0	1	0	1	1	0	0	1	156/84	156	84	0	5.03	1	0	1.03	0	1	18.0697	0	0	2	1	0	4	1	7	0	74.1	0	11.4	1.1	1	7	1	11	32
71	1	1	0	0	1	1	1	0	124/84	124	84	0	4.46	1.73	1	1.36	1	1	17.2	0	0	1	0	0	3b	0	8	1	190.5	1	13.5	1.00	1	7	1	12	60
74	1	0	0	0	0	1	1	0	110/77	110	77	0	4.24	1.61	0	0.86	0	1	24.7	0	0	1	0	0	2c	0	8	1	333.58	1	11.26	0.01	0	3	0	12	60
67	0	1	0	0	1	0	0	0	126/80	126	80	0	4.2	1.16	0	1.47	1	0	24.2	0	0	0	0	0	3b	0	9	1	352	1	13.5	0.05	0	5	0	12	42
74	1	0	0	0	1	0	1	1	135/72	135	72	0	5.45	1.2	0	1.49	1	0	24.3141	0	0	1	0	0	4	1	8	1	1088	1	13.92	0.01	0	6	0	28	60
79	1	0	0	1	1	0	0	0	120/70	120	70	1	8.65	1.67	0	1.16	1	0	24	0	0	1	0	0	3b	0	9	1	1200	1	12.3	1.44	1	7	1	15	39
76	1	0	0	0	0	0	0	0	120/69	120	69	0	5.13	1.35	0	1.18	1	0	19.5	0	0	0	0	0	4	1	9	1	153	1	16.3	0.67	0	6	0	25	60
79	1	0	1	0	0	0	0	1	140/80	140	80	0	4.46	0.73	0	2.07	1	0	20.4	0	0	1	0	0	3b	0	8	1	950	1	18.4	0.01	0	5	0	34	48
62	0	1	1	0	1	0	1	0	125/80	125	80	0	5.15	1.14	0	1.31	1	0	26.1	1	0	1	0	0	3b	0	9	1	956	1	15.6	1.94	1	8	1	18	19
78	1	1	1	1	0	0	0	1	160/100	160	100	0	4.12	0.89	0	0.9	0	1	22.1	0	0	2	1	0	3b	0	8	1	39	0	10.8	0.95	1	8	1	36	72
70	0	0	0	0	0	1	1	0	106/60	106	60	1	10.25	1	0	0.99	0	1	20.6	0	0	2	1	0	4	1	10	1	6488	1	4.26	0.15	0	3	0	8	18
69	0	1	0	0	0	1	1	1	142/89	142	89	0	4.53	1.07	0	1.18	1	0	18.9	0	0	1	0	0	2c	0	9	1	253.5	1	23.2	0.07	0	9	1	8	31
78	1	0	0	1	1	1	1	0	127/79	127	79	0	5.14	1.26	0	1.28	1	0	22	0	0	0	0	0	4	1	9	1	8317	1	12.10	0.04	0	4	0	16	60
71	1	0	0	0	1	0	0	1	150/82	150	82	0	4.55	0.6	0	1.74	1	0	17	0	0	1	0	0	2b	0	8	1	88	0	18.4	0.17	0	9	1	10	30
74	1	0	1	1	0	0	0	1	150/88	150	88	0	4.97	1.43	0	1.79	1	0	27	1	0	1	0	0	2c	0	7	0	95	0	15.4	0.24	0	6	0	18	40
78	1	1	1	1	1	1	1	1	121/97	121	97	0	5.36	1.14	0	1.07	1	0	31.8	1	0	1	0	0	4	1	8	1	215.2	1	9.85	0.47	0	7	1	9	11
72	1	0	1	0	1	1	1	1	120/85	120	85	1	7.6	0.79	0	1.43	1	0	20.4	0	0	2	1	0	4	1	8	1	683.55	1	15.3	0.79	1	8	1	15	30
58	0	1	0	0	1	0	0	0	120/80	120	80	0	5.4	1.4	0	0.99	0	1	27.4	1	0	2	1	0	3b	0	7	0	107.43	1	8.88	0.01	0	4	0	9	48
79	1	0	1	1	1	0	0	0	110/70	110	70	0	5.96	0.96	0	0.65	0	1	16.3	0	0	1	0	0	4	1	9	1	128.04	1	9.96	0.87	1	12	1	15	48
79	1	0	0	0	1	0	0	1	151/92	151	92	1	6.98	1.04	0	1.44	1	0	23.7	0	0	2	1	0	3b	0	7	0	79.26	0	17.54	0.1	0	5	0	17	36
63	0	0	0	0	0	1	1	0	110/70	110	70	0	4.3	1.4	0	0.83	0	1	22.4	0	0	1	0	0	4	1	8	1	411.7	1	22.3	0.01	0	7	1	24	36
71	1	0	1	0	0	1	1	1	160/68	160	68	0	5.4	1.1	0	0.46	0	1	21.5	0	0	2	1	0	2c	0	9	1	143.14	1	4.09	0.05	0	3	0	16	36
72	1	0	0	0	1	0	0	1	135/74	135	74	0	5.4	0.61	0	1.1	1	0	23	0	0	1	0	0	4	1	8	1	218.6	1	25.5	0.14	0	2	0	13	36
77	1	0	0	1	1	0	0	0	125/70	125	70	1	7.92	1.49	0	0.92	0	1	23	0	0	2	1	0	4	1	10	1	24.8	0	14.6	0.01	0	3	0	14	48
75	1	0	0	1	0	0	1	0	128/80	128	80	0	5.65	1.56	0	1.11	1	0	27.7	1	0	1	0	0	3b	0	10	1	863.3	1	15.7	0.01	0	7	1	29	48
78	1	1	0	0	1	0	1	0	120/70	120	70	0	5.09	0.96	0	1.08	1	0	18.3	0	0	0	0	0	4	1	10	1	687.8	1	19.6	0.72	1	10	1	30	48
73	1	0	0	0	1	0	1	0	118/60	118	60	1	7.41	1.04	0	1.5	1	0	20.2	0	0	1	0	0	3a	0	9	1	2142	1	18.4	0.01	0	4	0	22	36
63	0	1	0	0	1	0	1	0	120/82	120	82	0	3.78	1.39	0	0.6	0	1	24.1	0	0	1	0	0	4	1	8	1	587.2	1	8.21	0.1	0	3	0	28	36
81	1	0	0	0	1	0	0	1	130/85	130	85	0	5.52	0.92	0	1.29	1	0	18	0	0	1	0	0	4	1	8	1	221.23	1	5.23	0.01	0	2	0	21	36
72	1	0	0	1	1	0	1	1	151/96	151	96	0	4.2	1.29	0	1.04	1	0	25.3	1	0	2	1	0	3b	0	9	1	414.1	1	7.19	0.01	0	3	0	27	48
81	1	0	0	0	0	0	0	1	128/85	128	85	1	9.5	2.89	1	1.15	1	1	22.5	0	1	3	2	1	4	1	9	1	128.8	1	11.6	0.45	0	5	0	28	48
71	1	1	1	0	1	0	1	0	128/77	128	77	0	4.82	0.69	0	0.52	0	1	27.1	1	0	2	1	0	3b	0	10	1	15.67	0	15.3	0.97	1	5	0	28	48
76	1	0	0	1	1	0	0	0	120/70	120	70	0	5.31	2.48	1	1.32	1	1	24.8	0	0	1	0	0	4	1	9	1	239	1	12.5	0.07	0	3	0	28	48
80	1	1	0	0	1	0	0	1	135/80	135	80	0	5.24	1.33	0	0.75	0	1	31.2	1	1	3	2	1	4	1	9	1	415.6	1	12.94	0.57	0	10	1	32	48
78	1	0	1	1	0	0	0	0	120/80	120	80	0	4.23	0.95	0	1.12	1	0	20	0	0	0	0	0	2c	0	8	1	1891.5	1	8.9	0.17	0	5	0	24	36
74	1	1	0	0	0	0	0	0	125/76	125	76	1	8.07	2.27	1	1.28	1	1	20	0	0	2	1	0	4	1	7	0	40.4	0	15.2	0.32	0	4	0	12	24
67	0	1	0	0	0	0	0	1	127/86	127	86	0	4.34	0.7	0	0.97	0	1	20	0	0	2	1	0	4	1	10	1	391	1	25.6	0.22	0	6	0	23	24
68	0	1	0	1	0	0	0	0	116/80	116	80	0	5.5	1.8	1	0.64	0	1	20	0	0	2	1	0	2c	0	8	1	26	0	14.65	0.03	0	5	0	8	24
83	1	0	0	0	0	1	1	0	120/77	120	77	0	4.99	1.01	0	0.85	0	1	20	0	0	1	0	0	4	1	10	1	107.12	1	17.18	0.04	0	4	0	20	24
59	0	0	1	0	1	0	0	0	128/75	128	75	0	4.3	3.21	1	0.84	0	1	24	0	0	2	1	0	3b	0	10	1	2051	1	9.35	0.16	0	5	0	19	24
74	1	0	0	1	0	0	1	1	120/85	120	85	0	5.04	1.56	0	0.7	0	1	21	0	0	2	1	0	4	1	10	1	1477	1	4.7	0.32	0	3	0	7	24
68	0	0	0	0	0	0	1	0	127/60	127	60	0	5.25	1.08	0	1.14	1	0	23	0	0	0	0	0	3b	0	7	0	134	1	18.9	0.09	0	5	0	23	24
78	1	0	0	0	0	1	1	1	143/80	143	80	0	4.67	0.98	0	2.14	1	0	19	0	0	1	0	0	4	1	8	1	99.36	0	17	0.02	0	3	0	12	36
66	0	1	1	0	0	0	0	0	121/65	121	65	0	4.69	1.98	1	0.9	0	1	23	0	0	2	1	0	4	1	8	1	150.02	1	3.6	0.01	0	1	0	24	24
77	1	0	0	1	0	0	1	1	158/84	158	84	1	6.38	1.03	0	1.01	0	1	20	0	1	3	2	1	4	1	9	1	36.48	0	13.72	0.76	1	4	0	20	65
71	1	0	1	0	0	1	1	1	150/100	150	100	1	6.82	1.77	1	1.16	1	1	24.3	0	1	3	2	1	4	1	8	1	391.2	1	11.6	0.47	0	8	1	12	18
81	1	0	0	0	0	0	1	0	129/80	129	80	1	7.21	1.17	0	0.78	0	1	25.2	1	1	3	2	1	4	1	8	1	935	1	16	0.73	1	7	1	20	30
68	0	1	0	0	0	0	1	0	128/66	128	66	0	4.48	1.55	0	0.88	0	1	28.9	1	0	2	1	0	4	1	8	1	63.39	0	17.3	0.05	0	3	0	16	24
76	1	0	1	1	0	0	0	1	135/85	135	85	1	9.45	0.95	0	0.65	0	1	25.7	1	1	4	3	2	4	1	8	1	92.7	0	10.3	1.1	1	6	0	21	26
68	0	1	1	0	1	1	1	1	140/ 70	140	70	1	9.65	1.24	0	2.16	1	0	27.3	1	1	3	2	1	4	1	9	1	4551.5	1	7.47	0.77	1	6	0	10	12
81	1	0	1	0	0	0	1	1	170/90	170	90	1	7.04	0.82	0	0.81	0	1	26.3	1	1	4	3	2	4	1	8	1	4407	1	7.63	0.01	0	2	0	14	20
68	0	0	1	0	0	0	1	0	127/83	127	83	0	5.3	1.78	1	1.07	1	1	22.9	0	0	1	0	0	3a	0	9	1	481.2	1	18	0.04	0	4	0	16	20
74	1	0	0	1	0	0	0	1	148/63	148	63	1	6.38	0.85	0	0.94	0	1	28.4	1	1	4	3	2	3b	0	9	1	90.99	0	10.55	0.6	0	7	1	12	27
67	0	1	1	0	0	1	1	0	113/67	113	67	0	4.98	1.74	1	0.73	0	1	27.3	1	1	3	2	1	4	1	9	1	80.22	0	13.4	0.96	1	8	1	23	40
68	0	1	0	0	1	0	0	1	153/93	153	93	0	4.91	1.11	0	0.99	0	1	25.7	1	1	3	2	1	4	1	8	1	51.88	0	12.5	1	1	10	1	18	24
86	1	0	0	0	1	0	0	1	177/99	177	99	0	4.12	1.79	1	0.89	0	1	20.3	0	1	3	2	1	3b	0	8	1	57.27	0	12.06	0.55	0	5	0	20	26
76	1	1	1	1	1	0	1	1	136/84	136	84	1	7.43	1.74	1	0.9	0	1	27.8	1	1	5	3	2	4	1	8	1	886.1	1	13.88	0.55	0	6	0	24	60
76	1	1	1	0	0	0	0	1	143/75	143	75	0	5.16	1.39	0	0.89	0	1	25.1	1	1	3	2	1	4	1	8	1	146.58	1	10.5	0.36	0	3	0	11	32
73	1	0	0	0	1	0	1	1	178/92	178	92	1	6.83	0.8	0	0.98	0	1	23.9	0	1	3	2	1	3a	0	8	1	1612	1	15.4	0.65	0	10	1	20	62
76	1	1	0	0	0	0	0	1	140/90	140	90	0	5.45	1.96	1	0.78	0	1	23.1	0	1	3	2	1	4	1	9	1	2717	1	13.5	0.25	0	8	1	20	63
82	1	1	1	1	0	1	1	1	160/70	160	70	1	6.58	1.72	1	1.36	1	1	23.5	0	1	3	2	1	4	1	10	1	4245	1	18.7	0.90	1	5	0	23	31
69	0	1	1	0	0	1	1	0	125/70	125	70	0	4.37	2.02	1	0.73	0	1	25.1	1	1	3	2	1	3b	0	9	1	85.9	0	14.2	0.4	0	3	0	18	25
75	1	1	1	0	1	0	0	0	110/70	110	70	1	7.74	3.89	1	1.19	1	1	29.8	1	1	3	2	1	4	1	8	1	120.7	1	12.4	1.5	1	7	1	12	16
66	0	1	0	0	1	0	1	0	129/80	129	80	1	9.53	1.2	0	1.25	1	0	28.2	1	1	3	2	1	4	1	9	1	90.40	0	15.6	2.6	1	6	0	21	84
65	0	0	1	0	1	0	0	0	125/80	125	80	0	5.26	1.36	0	1.5	1	0	27.1	1	0	2	1	0	3b	0	9	1	149	1	5	0.08	0	4	0	28	84
67	0	0	0	0	1	0	0	0	125/75	125	75	0	4.9	1.97	1	0.89	0	1	26.8	1	1	3	2	1	4	1	8	1	130.5	1	9.4	0.13	0	5	0	20	72
63	0	0	0	1	1	1	1	0	127/80	127	80	1	6.61	3.54	1	1.16	1	1	25.1	1	1	3	2	1	3b	0	7	0	81.9	0	7.8	0.6	0	5	0	13	64
61	0	1	0	0	1	1	1	1	140/70	140	70	1	6.37	1.3	0	0.87	0	1	17	0	1	3	2	1	4	1	10	1	533	1	14.75	1.6	1	4	0	20	24
69	0	0	1	1	0	0	1	0	90/60	90	60	1	7.72	3.02	1	0.94	0	1	23.2	0	1	3	2	1	4	1	9	1	491.7	1	18.8	0.06	0	10	1	10	32
65	0	1	0	0	1	0	1	1	153/96	153	96	0	4.83	1.05	0	0.8	0	1	28.1	1	1	3	2	1	4	1	10	1	899.6	1	17.6	1.35	1	8	1	12	14
78	1	0	0	1	1	0	1	1	135/80	135	80	1	8.6	1	0	1.03	0	1	21.1	0	1	3	2	1	4	1	9	1	1290	1	10.2	0.83	1	5	0	60	84
68	0	1	0	1	1	0	1	1	132/101	132	101	1	11.4	1.49	0	1.06	1	0	27.7	1	1	3	2	1	4	1	8	1	220.7	1	12.57	0.05	0	9	1	11	22
77	1	1	0	0	1	0	0	0	120/80	120	80	1	6.97	2.01	1	0.81	0	1	26.7	1	1	4	3	2	3a	0	8	1	100	1	19	2.13	1	7	1	18	45
79	1	1	1	0	0	0	0	0	120/80	120	80	1	7.18	1.07	0	0.77	0	1	26.6	1	1	3	2	1	2c	0	8	1	43.9	0	5.5	0.05	0	10	1	22	28
65	0	0	1	0	0	1	1	1	140/65	140	65	1	8.3	1.18	0	1.08	1	0	25.6	1	1	3	2	1	4	1	9	1	28.9	0	12.3	0.12	0	6	0	39	56
69	0	1	1	0	0	0	1	0	105/63	105	63	1	7.18	3.11	1	1.18	1	1	25.7	1	1	3	2	1	4	1	10	1	5330	1	8.7	0.53	0	7	1	19	22
89	1	1	0	0	1	0	0	1	141/92	141	92	0	4.9	1.07	0	0.8	0	1	25.6	1	1	3	2	1	4	1	10	1	110.14	1	6.99	0.18	0	4	0	15	18
80	1	0	1	1	0	0	1	1	160/90	160	90	0	5.27	1.38	0	0.72	0	1	26	1	1	3	2	1	4	1	8	1	444.58	1	12.4	0.09	0	6	0	7	13
70	0	0	0	0	0	0	0	1	131/86	131	86	0	5.55	0.8	0	0.65	0	1	21	0	0	2	1	0	3b	0	9	1	148.53	1	21.98	0.15	0	3	0	18	37
70	0	1	1	0	0	0	1	0	126/80	126	80	1	17.55	2.9	1	0.99	0	1	24.2	0	1	3	2	1	4	1	9	1	176.01	1	14.64	0.99	1	5	0	22	72
73	1	1	1	0	1	0	1	0	120/70	120	70	1	7.76	1.01	0	0.75	0	1	15.6	0	0	2	1	0	4	1	9	1	2356.6	1	12.02	0.34	0	4	0	16	18
86	1	0	1	0	0	0	0	1	130/83	130	83	1	7.06	1.41	0	0.57	0	1	27.3	1	1	4	3	2	4	1	8	1	695.51	1	17.09	0.48	0	9	1	20	30
67	0	0	0	0	0	1	1	0	125/77	125	77	0	4.92	5.03	1	0.81	0	1	23.6	0	0	2	1	0	2b	0	8	1	406.30	1	11.2	0.04	0	5	0	20	26
66	0	0	0	0	0	1	1	1	150/90	150	90	0	4.28	1.52	0	0.97	0	1	25.8	1	1	3	2	1	3b	0	8	1	101	1	15.2	0.53	0	12	1	21	24
76	1	0	1	1	0	0	0	1	140/85	140	85	0	5.09	2.25	1	1	0	1	25.7	1	1	4	3	2	4	1	8	1	266.45	1	10.3	0.42	0	5	0	15	18
77	1	0	1	0	0	0	1	1	140/75	140	75	1	8.45	0.92	0	0.87	0	1	25.7	1	1	4	3	2	4	1	8	1	574.54	1	15.4	0.05	0	4	0	13	18
69	0	0	0	1	0	0	1	0	129/80	129	80	0	5.06	2.04	1	0.93	0	1	20.8	0	0	2	1	0	4	1	8	1	240	1	11.6	0.05	0	8	1	10	14
68	0	1	0	0	0	1	1	1	140/ 70	140	70	1	12.11	0.64	0	1.21	1	0	20.8	0	0	2	1	0	3b	0	8	1	406.30	1	11.2	0.08	0	4	0	5	5
59	0	1	0	0	1	1	1	1	160/95	160	95	1	6.5	1.54	0	0.79	0	1	31.2	1	1	4	3	2	4	1	9	1	81.9	0	7.8	0.06	0	3	0	16	20
73	1	1	1	1	0	0	1	1	145/86	145	86	1	6.6	1.37	0	0.88	0	1	26.1	1	1	4	3	2	4	1	10	1	596	1	11.4	0.31	0	2	0	12	18
77	1	0	0	0	0	0	1	1	142/67	142	67	1	6.78	0.78	0	0.82	0	1	23.8	0	1	3	2	1	4	1	8	1	19648	1	12.3	0.31	0	5	0	23	28
69	0	0	1	0	1	0	1	1	131/65	131	65	1	8.42	1.27	0	0.79	0	1	23.5	0	1	3	2	1	4	1	9	1	58.4	0	17.3	0.72	1	10	1	9	12
74	1	0	0	0	0	0	1	1	144 /78	144	78	1	8.21	2.63	1	1.34	1	1	24.1	0	1	3	2	1	3b	0	8	1	1670	1	21.6	0.04	0	5	0	22	57
67	0	0	1	1	1	0	1	1	144/76	144	76	1	7.62	3.74	1	1.73	1	1	26.2	1	1	4	3	2	4	1	8	1	8486	1	16.2	1.34	1	12	1	25	28
81	1	0	0	0	0	0	1	1	143/76	143	76	1	7.08	2.32	1	0.88	0	1	26	1	1	5	3	2	4	1	10	1	763.5	1	7.8	0.06	0	9	1	34	60
68	0	1	0	0	0	0	1	1	170/89	170	89	0	4.74	1.49	0	0.82	0	1	24	0	0	2	1	0	4	1	10	1	77.4	0	18.4	0.04	0	4	0	30	60
76	1	1	0	1	0	1	1	1	140/90	140	90	0	3.85	1.96	1	0.78	0	1	23.1	0	1	3	2	1	3b	0	8	1	637	1	4.6	0.63	0	8	1	18	40
66	0	1	0	0	0	0	1	1	140/80	140	80	0	4.98	0.69	0	0.97	0	1	25	1	1	3	2	1	4	1	8	1	4547	1	14.8	0.05	0	4	0	40	50
79	1	1	0	0	1	0	1	1	142/77	142	77	0	5.3	1.17	0	1	0	1	26.5	1	1	3	2	1	3b	0	8	1	644.4	1	5.9	0.06	0	2	0	27	43
88	1	0	1	1	0	0	1	1	160/90	160	90	0	3.4	1	0	0.88	0	1	26	1	1	3	2	1	4	1	8	1	960.5	1	20.4	0.35	0	5	0	24	38
69	0	1	0	0	0	0	1	1	140/76	140	76	1	6.21	1.17	0	0.56	0	1	26.2	1	1	4	3	2	4	1	10	1	351	1	5.78	0.96	1	6	0	15	30
67	0	0	1	1	0	0	1	0	124/70	124	70	1	7.92	1.21	0	0.83	0	1	15.6	0	0	2	1	0	3b	0	9	1	1728.3	1	20.4	0.09	0	3	0	14	23
79	1	0	1	0	1	0	1	1	133/83	133	83	1	6.2	1.73	1	1.51	1	1	19	0	1	3	2	1	4	1	8	1	997.5	1	12.5	0.04	0	5	0	20	48
69	0	0	0	0	0	0	0	0	128/82	128	82	0	5.51	1.76	1	0.76	0	1	30.8	1	1	3	2	1	3a	0	7	0	9.38	0	3.6	0.01	0	2	0	23	63
64	0	1	1	1	0	0	1	1	150/100	150	100	1	6.64	2.32	1	0.6	0	1	27	1	1	5	3	2	4	1	10	1	3458	1	23	0.51	0	8	1	8	50
73	1	1	1	0	0	0	1	0	125/80	125	80	0	5.44	2.42	1	0.99	0	1	25.9	1	1	3	2	1	4	1	9	1	377.02	1	15	1.58	1	8	1	25	42
70	0	1	1	1	0	1	1	1	157/80	157	80	1	6.68	1.0	0	0.75	0	1	22	0	1	3	2	1	4	1	9	1	29.46	0	16.18	0.49	0	4	0	25	36
73	1	0	1	0	1	0	0	1	178/92	178	92	1	8.83	0.8	0	0.98	0	1	23.9	0	1	3	2	1	3b	0	9	1	39.60	0	0.06	0.06	0	11	1	20	41
78	1	0	0	1	0	0	1	1	141/80	141	80	0	5	2.27	1	0.89	0	1	29	1	1	4	3	2	4	1	8	1	59.5	0	17.7	0.08	0	3	0	28	48
67	0	1	0	0	0	0	1	1	136/72	136	72	1	6.21	0.88	0	1.16	1	0	31.9	1	1	3	2	1	4	1	9	1	3579	1	16	0.07	0	2	0	12	60
83	1	0	1	1	0	1	1	1	136/82	136	82	1	9.43	1.52	0	0.76	0	1	30	1	1	4	3	2	4	1	9	1	3099.3	1	2.2	0.53	0	4	0	10	36
83	1	0	1	0	0	0	1	0	125/82	125	82	1	10.74	2.02	1	1.31	1	1	25	1	1	3	2	1	4	1	10	1	2897	1	11.1	0.66	0	9	1	9	43
77	1	0	0	0	0	1	1	1	137/84	137	84	0	5.06	1.22	0	1.01	0	1	26.1	1	1	3	2	1	4	1	8	1	886.1	1	16.9	1.50	1	9	1	16	28
67	0	0	0	1	0	1	1	0	127/84	127	84	1	6.36	1.72	1	1.01	0	1	24.1	0	1	3	2	1	2c	0	8	1	280	1	12.6	0.06	0	10	1	16	48
69	0	1	0	0	0	0	1	1	140/76	140	76	0	5.01	1.17	0	0.56	0	1	26.2	1	1	3	2	1	4	1	9	1	70.3	0	18	0.19	0	4	0	15	38
88	1	0	0	0	1	1	1	0	115/65	115	65	1	7.78	1.82	1	0.86	0	1	19.2	0	1	3	2	1	4	1	10	1	19648	1	22.3	0.55	0	7	1	21	36
75	1	0	1	1	1	0	1	0	110/70	110	70	1	7.8	1.2	0	0.7	0	1	28.1	1	1	3	2	1	4	1	9	1	857.40	1	17.03	1.30	1	12	1	8	19
65	0	1	0	0	0	0	1	1	180/107	180	107	0	3.8	0.78	0	0.64	0	1	29.1	1	1	3	2	1	2b	0	8	1	13.15	0	11.77	0.06	0	6	0	16	36
56	0	0	1	1	0	0	0	1	149/88	149	88	1	12	2.4	1	0.65	0	1	21.6	0	1	4	3	2	4	1	9	1	468.8	1	3.6	0.63	0	10	1	18	33
74	1	1	0	0	1	0	1	1	147/98	147	98	0	4.27	4.3	1	0.63	0	1	32	1	1	4	3	2	4	1	9	1	1131.4	1	15.6	0.02	0	3	0	9	26
70	0	1	0	0	1	0	1	0	120/80	120	80	0	5.12	1.14	0	0.89	0	1	14.5	0	0	1	0	0	4	1	9	1	3023	1	20.5	0.02	0	4	0	8	36
76	1	0	0	0	1	0	0	1	160/94	160	94	1	6.57	1.74	1	1.37	1	1	20.3	0	1	3	2	1	3a	0	8	1	520	1	15.8	0.03	0	2	0	15	48
81	1	0	1	1	1	0	1	0	120/70	120	70	1	7.3	1.75	1	0.78	0	1	26.6	1	1	4	3	2	4	1	10	1	1917.8	1	21	0.59	0	7	1	13	33
64	0	0	0	0	0	0	1	0	130/70	130	70	0	5.31	1.88	1	0.86	0	1	26.9	1	1	3	2	1	4	1	9	1	617	1	18	0.41	0	6	0	12	36
65	0	1	0	0	1	0	0	0	120/70	120	70	1	9.2	0.92	0	0.75	0	1	28.4	1	1	3	2	1	3b	0	7	0	275	1	10	0.06	0	2	0	5	6
71	1	0	0	0	1	0	0	1	135/80	135	80	0	4.27	2.62	1	1.17	1	1	29.1	1	1	3	2	1	3a	0	7	0	87.9	0	15.9	0.24	0	6	0	18	48
65	0	1	0	0	0	1	1	1	145/65	145	65	0	5.55	0.85	0	0.73	0	1	27	1	1	3	2	1	4	1	10	1	41.7	0	21	0.08	0	3	0	9	36
60	0	1	1	1	0	0	0	0	120/80	120	80	0	5.48	2.88	1	0.99	0	1	25.2	1	1	3	2	1	4	1	8	1	77.2	0	16.7	0.10	0	5	0	11	36
78	1	0	0	1	1	0	1	1	163/83	163	83	1	6.82	1.7	1	0.74	0	1	17.7	0	1	4	3	2	3b	0	7	0	138	1	19.5	0.29	0	5	0	15	36
72	1	1	0	0	1	0	0	1	142/89	142	89	0	4.58	1.72	1	0.64	0	1	20	0	1	3	2	1	4	1	8	1	100.5	1	18.4	0.51	0	6	0	18	36
78	1	0	1	1	1	0	1	1	144/70	144	70	0	4.92	1.89	1	0.62	0	1	22.7	0	1	3	2	1	4	1	9	1	129	1	6.78	0.10	0	12	1	18	20
78	1	0	0	0	1	1	1	1	134/70	134	70	1	6.05	1.1	0	0.89	0	1	26.3	1	1	4	3	2	3b	0	8	1	312.3	1	12.06	0.05	0	9	1	12	31
88	1	0	0	1	1	1	1	1	140/65	140	65	1	6.2	1.49	0	1.08	1	0	26.5	1	1	3	2	1	4	1	8	1	8460	1	7.52	0.22	0	7	1	12	36
82	1	0	0	0	1	0	1	1	128/86	128	86	0	5.52	2.04	1	0.52	0	1	20.8	0	1	3	2	1	4	1	9	1	250.4	1	17.56	0.92	1	4	0	13	19
73	1	0	1	1	1	1	1	0	125/84	125	84	1	14.4	1.82	1	1.01	0	1	21.8	0	1	3	2	1	3b	0	8	1	997.5	1	21	0.09	0	9	1	21	36
63	0	0	0	0	0	0	1	1	140/93	140	93	0	5.2	1.73	1	0.72	0	1	27.7	1	1	4	3	2	4	1	8	1	668	1	16.8	0.11	0	12	1	11	29
74	1	0	0	0	0	0	0	1	141/80	141	80	0	5.38	1.96	1	0.73	0	1	17.9	0	1	3	2	1	4	1	9	1	37.03	0	21.89	0.07	0	5	0	18	36
55	0	1	1	1	1	0	0	0	126/76	126	76	1	6.83	1.91	1	1.29	1	1	25.9	1	1	3	2	1	2c	0	8	1	26.46	0	13.34	0.06	0	11	1	23	30
66	0	1	0	0	0	0	1	1	150/76	150	76	0	5.07	3.1	1	1.13	1	1	26	1	1	3	2	1	4	1	9	1	162.84	1	9.74	0.14	0	10	1	18	48
69	0	1	0	0	0	0	1	1	130/77	130	77	1	10.38	1.03	0	4.82	1	0	26	1	1	3	2	1	4	1	10	1	871.1	1	15.13	0.65	0	6	0	16	48
74	1	1	0	0	1	1	1	1	140/81	140	81	1	9.76	0.66	0	0.76	0	1	26.3	1	1	4	3	2	3b	0	8	1	4259.6	1	8.56	0.49	0	7	1	23	30
69	0	1	0	0	1	0	1	0	124/76	124	76	1	6.81	2.37	1	1.09	1	1	32.4	1	1	3	2	1	4	1	8	1	149	1	17.1	0.17	0	5	0	9	36
61	0	1	0	0	1	0	0	1	140/78	140	78	1	7.18	0.97	0	0.66	0	1	20.4	0	1	3	2	1	4	1	9	1	1791.6	1	16.92	0.02	0	3	0	12	23
67	0	0	1	1	0	1	1	1	130/90	130	90	0	4.46	1.76	1	1.46	1	1	27.4	1	1	3	2	1	2c	0	8	1	903.3	1	8.06	0.01	0	4	0	14	48
81	1	0	1	1	1	1	1	1	160/100	160	100	1	7.3	1.75	1	0.38	0	1	26.6	1	1	5	3	2	2c	0	8	1	1106	1	11.36	0.7	1	7	1	9	25
78	1	1	1	0	1	0	0	1	165/90	165	90	1	6.99	1.04	0	1	0	1	24.8	0	1	3	2	1	2a	0	6	0	13.32	0	15.22	0.02	0	3	0	12	36
63	0	0	0	0	1	0	1	0	126/84	126	84	0	5.37	4.35	1	0.98	0	1	27	1	1	3	2	1	4	1	8	1	337.8	1	8.69	0.07	0	10	1	10	24
66	0	1	1	1	0	0	0	1	157/87	157	87	1	9.43	0.98	0	0.88	0	1	31	1	1	4	3	2	3a	0	9	1	320.8	1	11.01	0.09	0	4	0	18	23
83	1	0	0	0	0	0	1	1	160/80	160	80	0	5.52	0.6	0	1.22	1	0	25	1	1	3	2	1	4	1	8	1	141	1	16.04	0.46	0	11	1	6	24
77	1	0	0	0	1	0	1	1	135/80	135	80	1	7.97	1.03	0	0.98	0	1	21.3	0	1	3	2	1	3b	0	8	1	29.06	0	18.42	0.07	0	5	0	9	36
72	1	0	1	0	0	0	0	1	132/75	132	75	1	6.69	2.96	1	0.96	0	1	25	1	1	5	3	2	2a	0	6	0	10.06	0	9.34	0.27	0	9	1	20	25
62	0	0	0	1	0	0	1	0	129/78	129	78	0	5.49	3.89	1	0.7	0	1	25	1	1	3	2	1	4	1	9	1	4547	1	10.84	0.05	0	4	0	33	36
70	0	1	0	0	1	0	1	1	145/80	145	80	0	5.11	1.89	1	0.89	0	1	21.5	0	1	3	2	1	3b	0	9	1	41.87	0	15.52	3.3	1	8	1	16	36
83	1	1	0	1	1	0	0	1	135 /87	135	87	0	5.5	2.54	1	0.84	0	1	22.3	0	1	3	2	1	2b	0	8	1	7.83	0	1.08	0.05	0	3	0	11	29
72	1	1	0	0	0	0	1	0	125/78	125	78	0	5.28	3.02	1	0.9	0	1	27	1	1	3	2	1	4	1	10	1	28.44	0	15.14	0.05	0	6	0	11	36
73	1	0	1	1	0	0	1	0	115/65	115	65	0	5.02	1.62	0	1.15	1	0	25.3	1	0	1	0	0	T4	1	7	0	467	1	3.8	0.07	0	1	0	22	24
61	0	1	0	1	0	1	1	0	129/76	129	76	1	6.32	2.23	1	1.05	1	1	26	1	1	3	2	1	T4	1	8	1	24.6	0	6.24	0.09	0	11	1	12	24
83	1	0	0	0	0	0	0	1	135/82	135	82	1	6.89	1.86	1	1.23	1	1	23	0	1	3	2	1	T3b	0	9	1	198.59	1	12.43	0.13	0	7	1	18	24
66	0	1	1	1	1	0	1	1	130/75	130	75	1	6.65	0.97	0	1.16	1	0	25.6	1	0	2	1	0	T4	1	7	0	31.28	0	7.23	0.04	0	4	0	20	24
68	0	0	1	0	0	0	0	1	145/76	145	76	1	6.32	1.89	1	0.96	0	1	27	1	1	5	3	2	T2b	0	6	0	24.33	0	5.36	0.1	0	6	0	21	24
63	0	0	1	0	1	1	1	1	130/89	130	89	1	7.74	2.24	1	1.32	1	1	26	1	1	4	3	2	T3b	0	9	1	1252.8	1	12.7	0.09	0	5	0	22	24
56	0	1	0	1	1	0	1	0	110/70	110	70	0	4.89	2.36	1	0.68	0	1	30	1	1	3	2	1	T4	1	9	1	287	1	3.62	0.1	0	3	0	9	24
64	0	0	1	0	0	0	0	1	129/85	129	85	0	4.96	1.65	0	0.92	0	1	26	1	1	3	2	1	T4	1	8	1	85.37	0	12.08	0.15	0	5	0	30	36
56	0	1	0	1	1	0	1	0	125/76	125	76	0	5.65	2.86	1	1	0	1	25.8	1	1	3	2	1	T3b	0	7	0	42.92	0	11.21	0.1	0	7	1	19	36
78	1	0	0	1	0	0	1	1	149/87	149	87	1	7.62	1.23	0	0.99	0	1	26	1	1	4	3	2	T4	1	10	1	210.25	1	2.74	0.81	1	8	1	11	28
70	0	0	0	0	0	1	1	1	158/84	158	84	0	5.15	1.86	1	1.12	1	1	25	1	1	3	2	1	T4	1	9	1	884	1	12.91	0.07	0	9	1	24	24
70	0	0	0	0	1	0	1	1	135/90	135	90	0	5.76	1.23	0	1.5	1	0	25	1	0	2	1	0	T4	1	8	1	587.4	1	3.8	0.06	0	3	0	8	24
80	1	0	1	1	1	0	0	1	130/76	130	76	0	4.65	2.54	1	0.76	0	1	19	0	1	3	2	1	T3b	0	8	1	38.04	0	13.62	0.38	0	10	1	12	24
72	1	0	0	1	1	1	1	0	105/63	105	63	0	4.52	1.96	1	2.05	1	1	25	1	0	2	1	0	T3b	0	8	1	1395.4	1	18.29	0.06	0	4	0	15	24
65	0	1	1	0	0	0	1	0	121/72	121	72	0	4.89	2.66	1	0.85	0	1	26	1	1	3	2	1	T4	1	9	1	52.93	0	4.56	0.19	0	6	0	18	24
73	1	1	1	1	1	0	0	1	124/85	124	85	0	5.53	2.03	1	1.85	1	1	20.6	0	0	2	1	0	T3b	0	7	0	8.75	0	15.17	0.01	0	3	0	23	24
68	0	1	1	1	1	0	1	0	125/76	125	76	0	5.58	1.89	1	0.97	0	1	32	1	1	3	2	1	T4	1	9	1	108.32	1	2.07	0.07	0	5	0	6	15
75	1	0	0	0	0	0	0	1	146/79	146	79	1	6.9	1.65	0	1.02	0	1	24	0	1	3	2	1	T2a	0	9	1	19.59	0	15.5	0.46	0	12	1	15	24
63	0	0	1	0	1	0	0	0	110/65	110	65	0	4.86	1.92	1	1.15	1	1	20	0	0	1	0	0	T2c	0	9	1	94.24	0	18.92	0.06	0	2	0	24	24
72	1	1	0	1	1	1	1	1	152/80	152	80	0	4.65	2.53	1	0.83	0	1	24	0	1	3	2	1	T4	1	9	1	1692.2	1	4.38	0.23	0	6	0	18	24
66	0	0	0	0	0	0	1	0	125/77	125	77	1	6.12	2.02	1	0.79	0	1	20.2	0	1	3	2	1	T3b	0	8	1	49.86	0	15.38	0.12	0	7	1	25	52
72	1	1	1	1	1	0	1	1	161/85	161	85	0	5.86	2.45	1	1.13	1	1	28	1	1	3	2	1	T4	1	9	1	468	1	7.62	0.02	0	8	1	9	26
